# Supplementary figures and images for: Understanding the Influence of Patient Factors on Accuracy and Decision-Making in a Diagnostic Accuracy Study with Multiple Raters—A Case Study from Dentistry
Source: MDPI journal article supplement (doi:10.3390/ijerph20031781), 2023-01-18

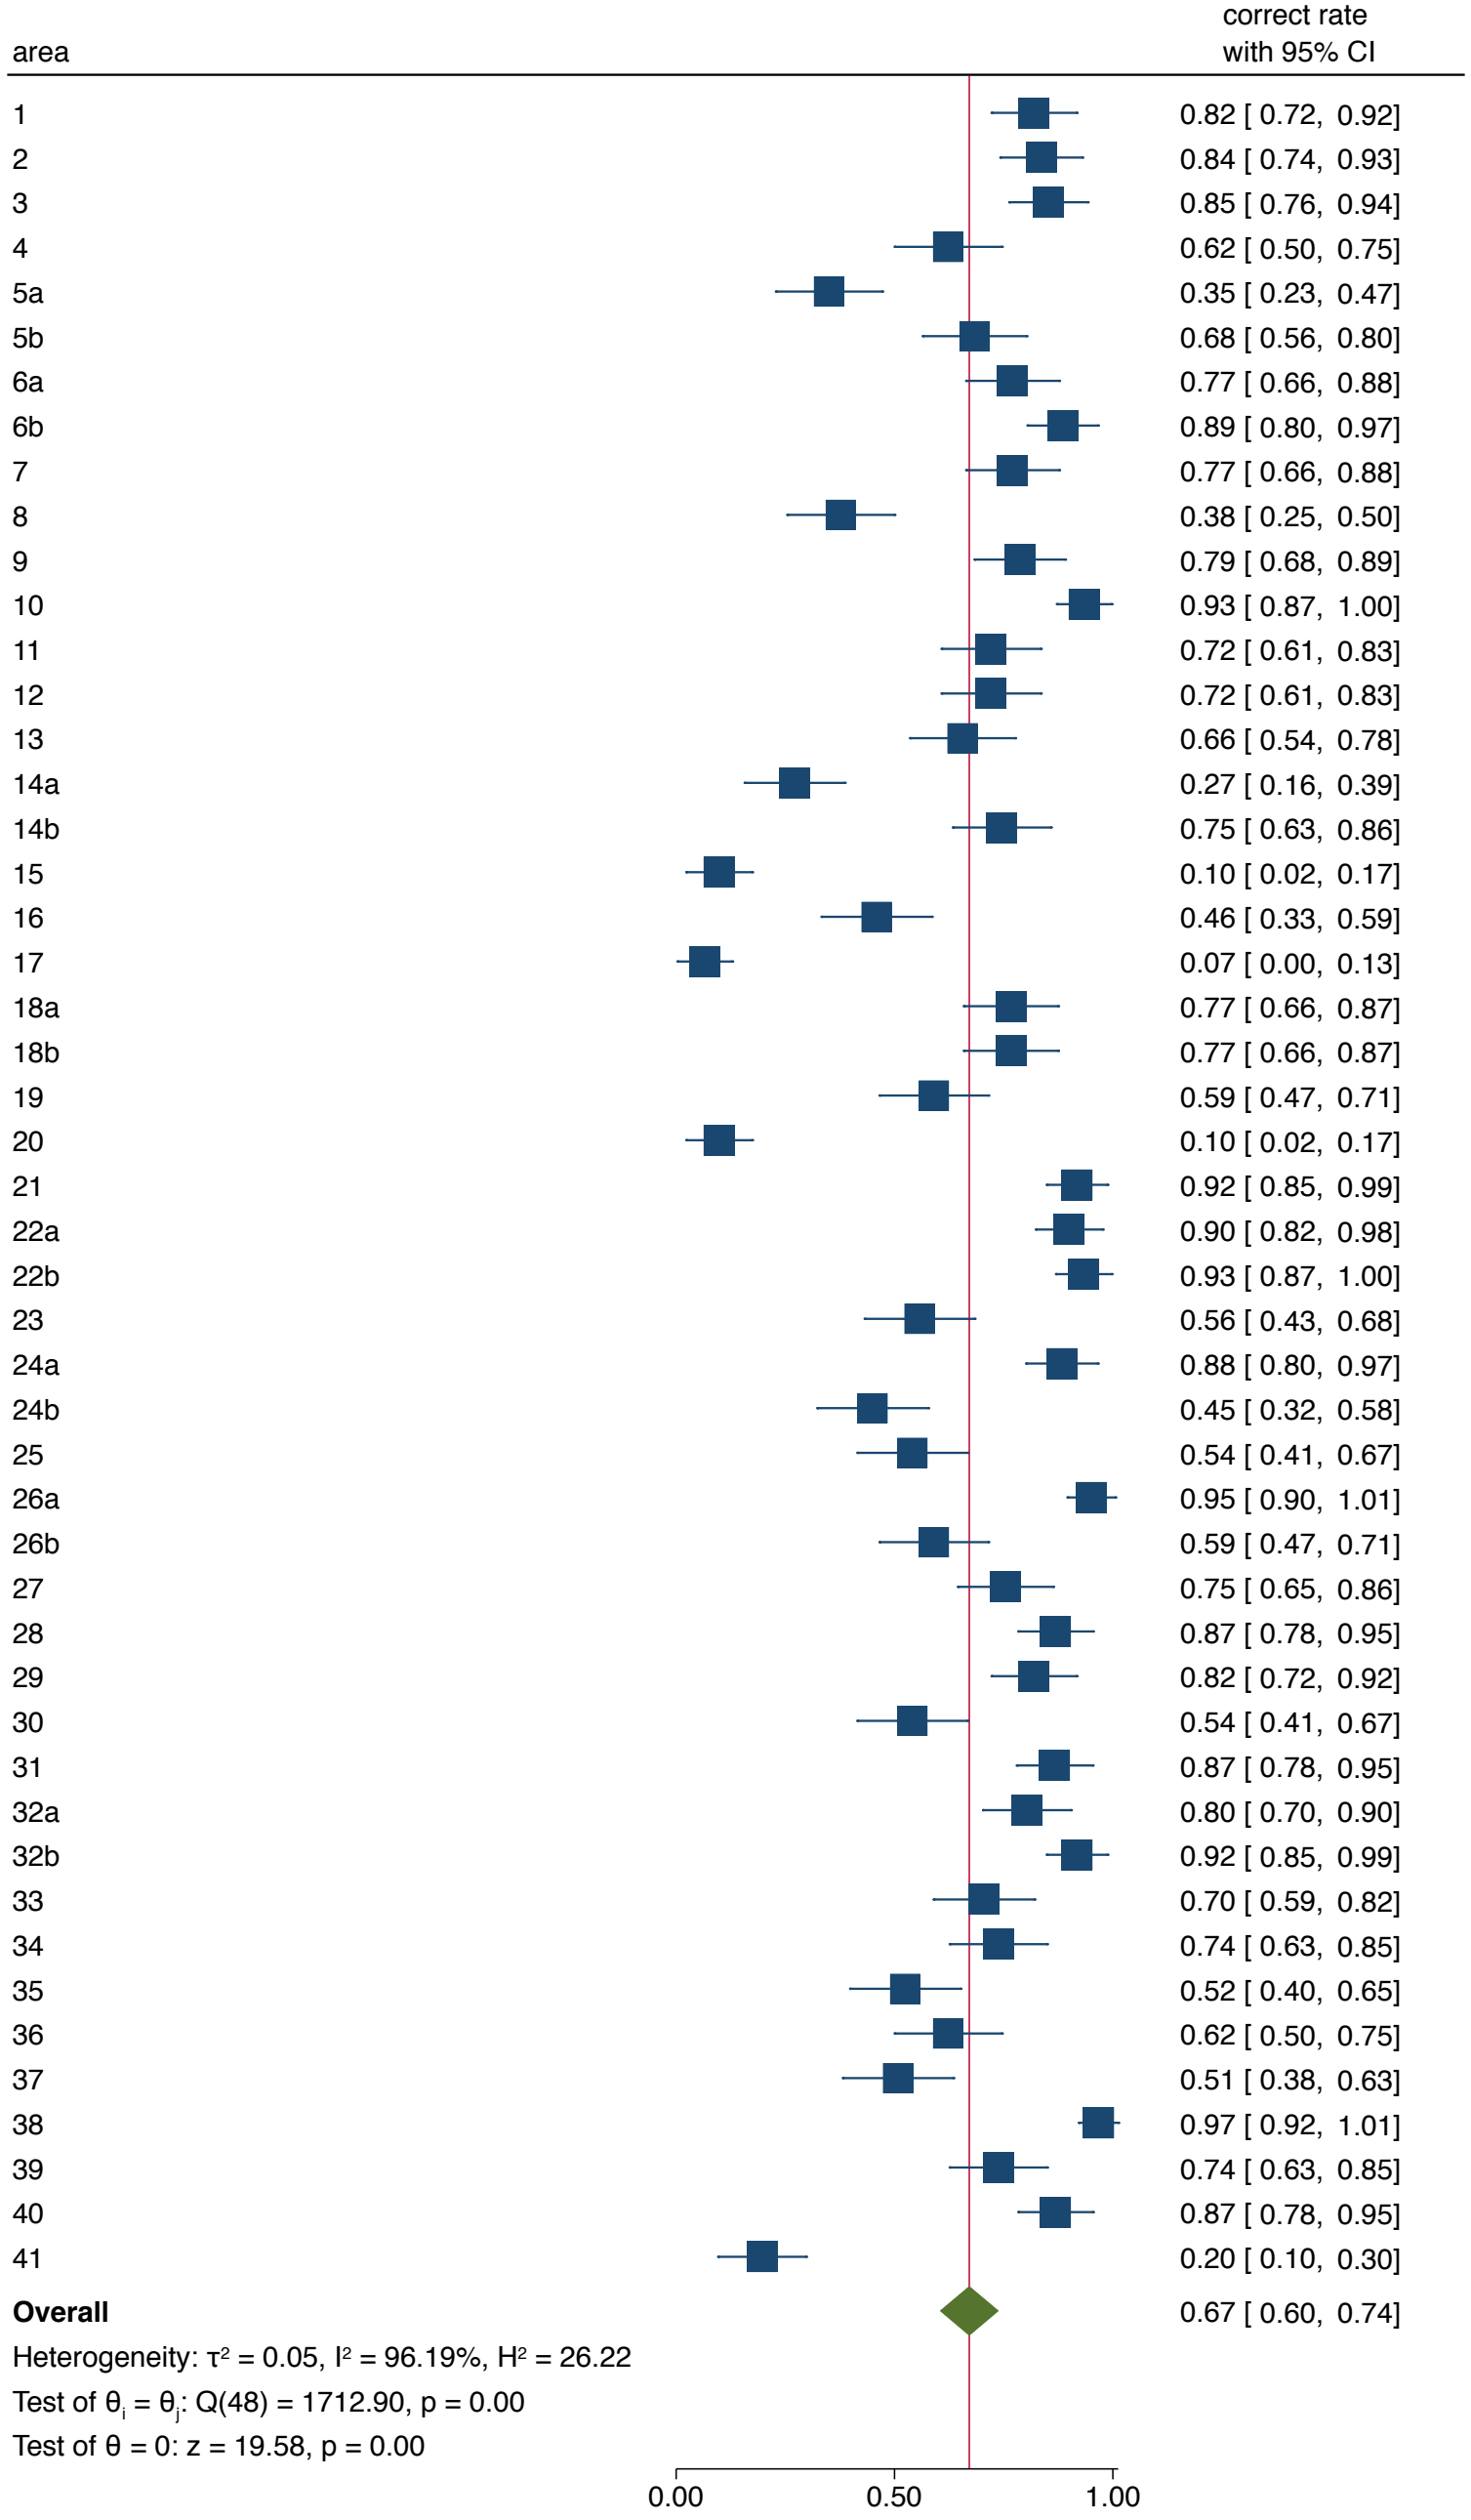

Supplement: s1 [file s1]

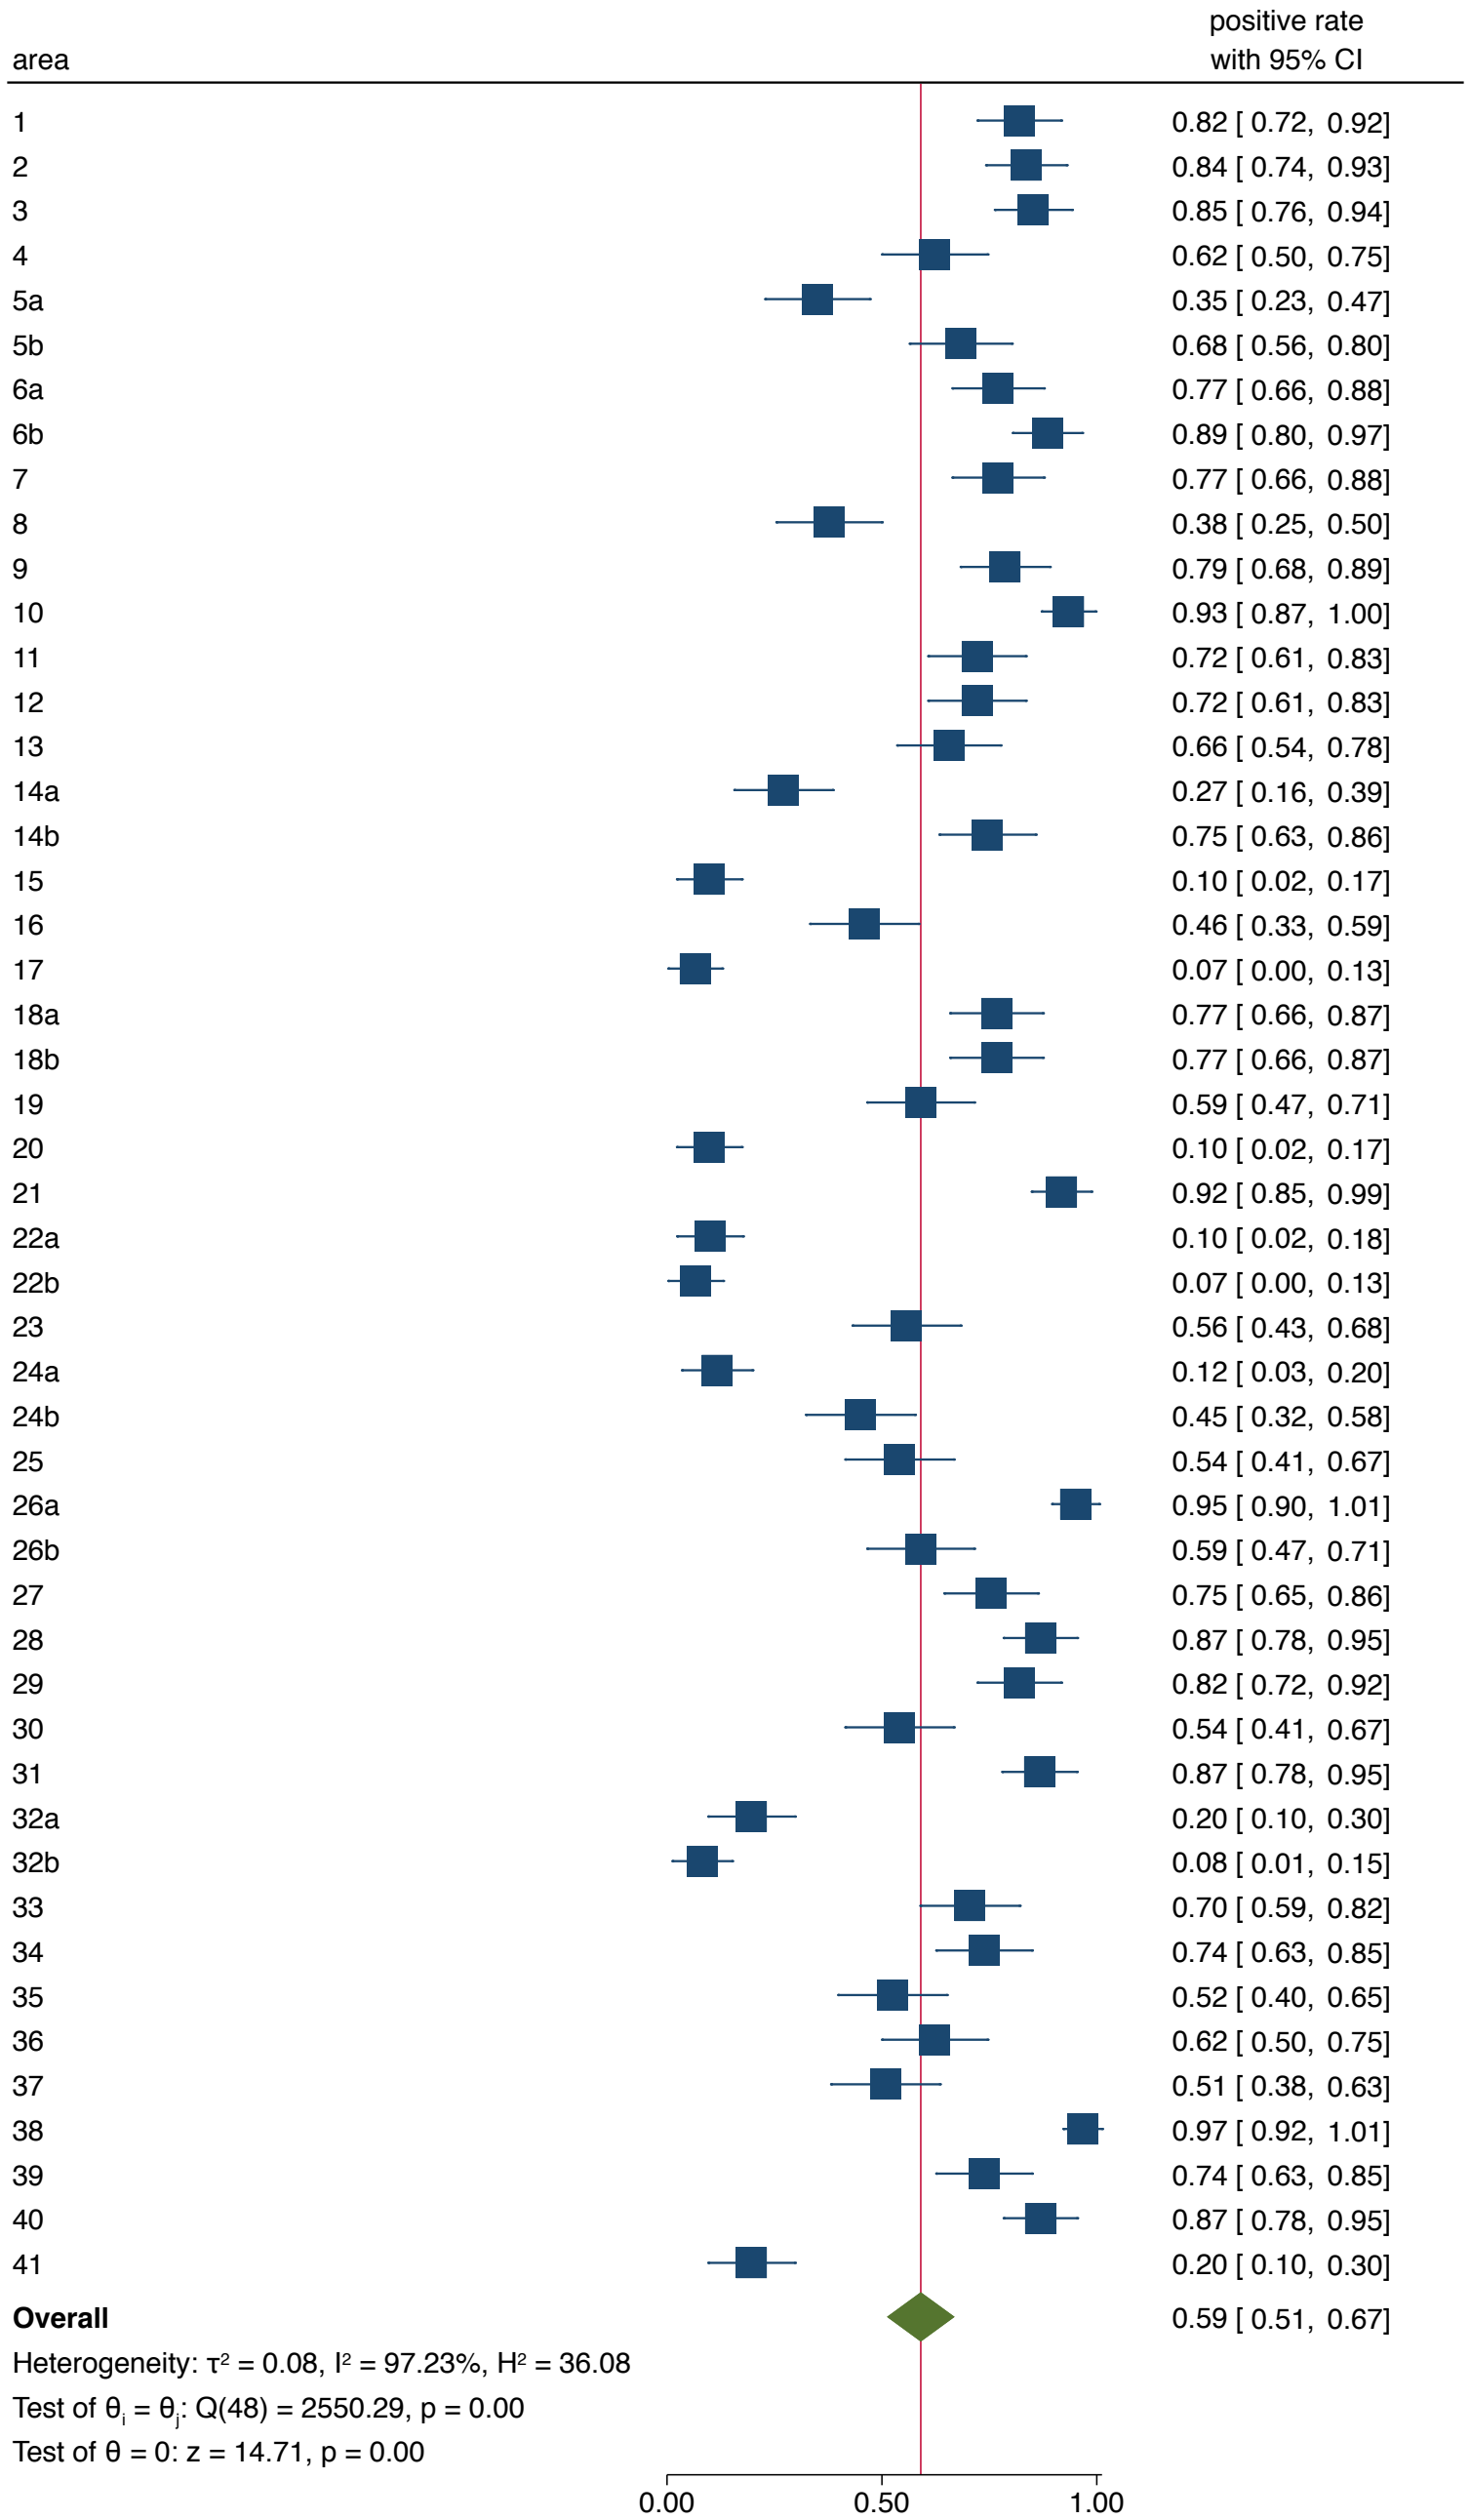

Supplement: s1 [file s1]
